# Supplementary material for: Neonatal Maternal Separation Induces Sexual Dimorphism in Brain Development: The Influence on Amino Acid Levels and Cognitive Disorders
Source: MDPI journal article supplement (doi:10.3390/biom13101449), 2023-09-26
Supplement: s1 [file s1]

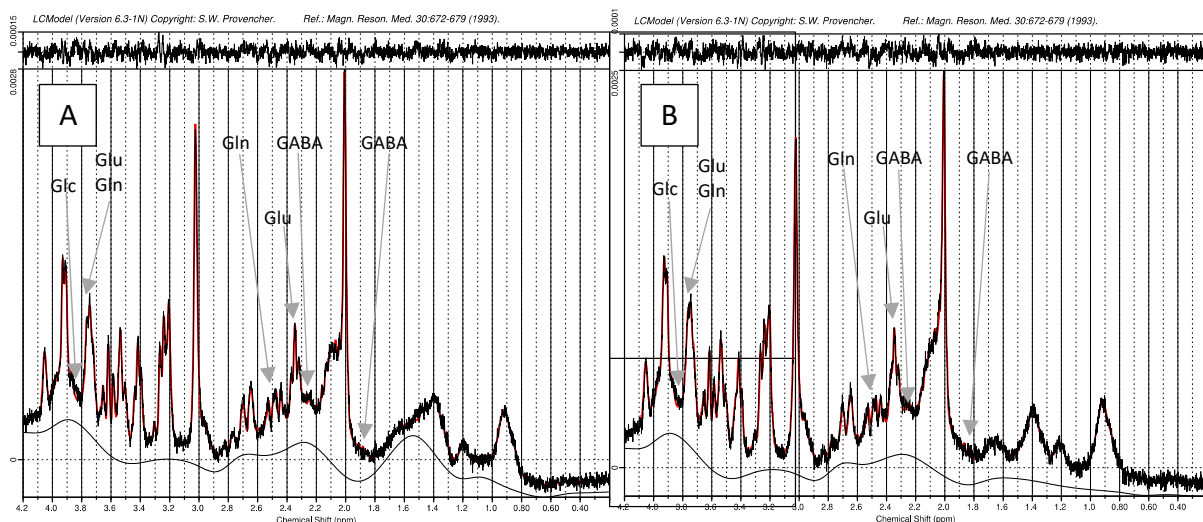

**Figure S1.** *In vivo* protein magnetic resonance spectrometry ( $^1\text{H}$ MRS) spectrum in the hippocampus of one randomly chosen adult male rat: (A) the control group, (B) the group that received ethanol between PND4-9. 7T Bruker, animal system. Glutamate (Glu), glutamine (Gln), glycine (Glc), gamma-aminobutyric acid (GABA).

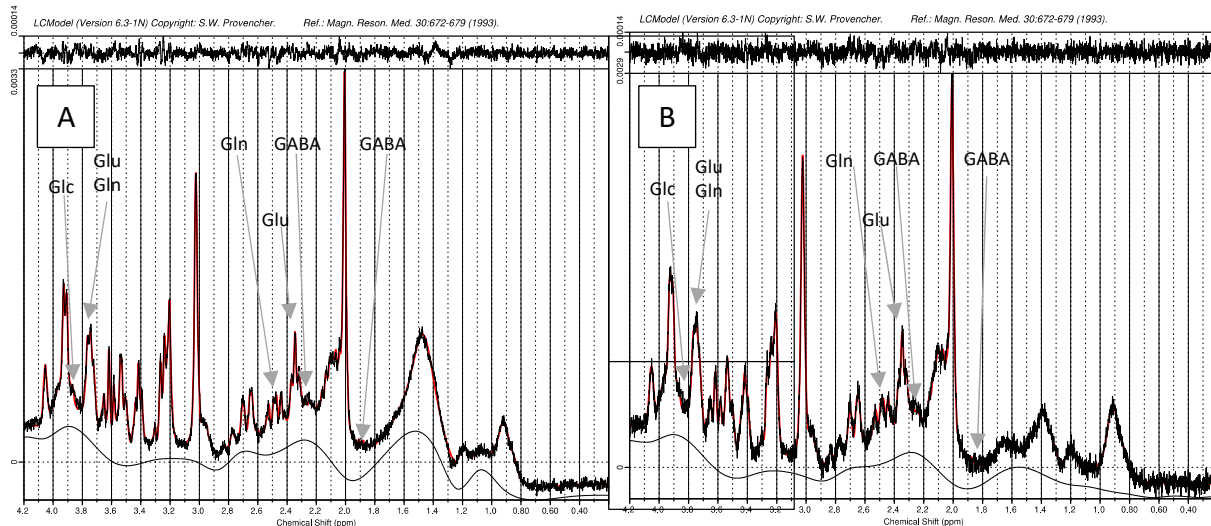

**Figure S2.** *In vivo* protein magnetic resonance spectrometry ( $^1\text{H}$ MRS) spectrum in the hippocampus of one randomly chosen adult female rat: (A) The control group, (B) The group that received ethanol between PND4-9. 7T Bruker, animal system. Glutamate (Glu), glutamine (Gln), glycine (Glc), gamma-aminobutyric acid (GABA).
